# Supplementary material
Source: PubMed Central journal article supplement (PMC5746429)
Supplement: NIHMS919631-supplement-3.pdf [file NIHMS919631-supplement-3.pdf]

## **Supplemental Information**

### **Dose discrimination in single cells exposed to cytokines**

Qihong Zhang, Sanjana Gupta, David L. Schipper, Gabriel Kowalczyk, Allison E. Mancini, James R. Faeder, Robin E. C. Lee

#### **SUPPLEMENTAL CONTENTS**

|                               |      |         |
|-------------------------------|------|---------|
| Supplemental Figure & Legends | .... | Page 2  |
| Supplemental Movie Legends    | .... | Page 10 |
| Supplemental Tables           | .... | Page 11 |

A

Model 1: Switch-like response

$$Response = \eta_{basal} + H(dose) \times SF_1 \times CellState \times \eta_{induced}$$

Model 2: Graded response

$$Response = \eta_{basal} + dose \times SF_2 \times CellState \times \eta_{induced}$$

Model 3: Graded response with threshold

$$Response = \eta_{basal} + H(dose) \times dose \times SF_3 \times CellState \times \eta_{induced}$$

$$H(dose) \equiv \begin{cases} 0, & dose \leq thresh \\ 1, & dose > thresh \end{cases}$$

B

| Parameter        | Value         | Description                                                                                                                    |
|------------------|---------------|--------------------------------------------------------------------------------------------------------------------------------|
| $\eta_{basal}$   | 0-5           | Adds a random value to cellular responses to simulate basal noise and cell-to-cell heterogeneity                               |
| $\eta_{induced}$ | $\pm 0-15\%$  | Random fluctuations were incorporated into the dose-dependent response of each cell to simulate biological noise               |
| $dose$           | [0, 1, 2, 3]  | Each model was simulated with 4 integer doses, with '0' representing the untreated condition                                   |
| $SF_1$           | 6             | Scaling factor for Model 1 to normalize responses between models                                                               |
| $SF_2$           | 1.5           | Scaling factor for Model 2                                                                                                     |
| $SF_3$           | 2             | Scaling factor for Model 3                                                                                                     |
| $CellState$      | [1,2,...,100] | Each cell was initialized with a unique integer value to describe its state                                                    |
| $thresh$         | 0-4           | Each cell was initialized with a random value to describe its threshold for activation (used with $H(dose)$ in models 1 and 3) |

**Figure S1, related to main figure 1. Description for 3 models of single cell dose responses. (A)** Formulae for (M1) Switch-like, (M2) Graded, and (M3) Graded with threshold (top, middle and bottom respectively) models of single cell responses. M1 and M3 differ from M2 because they incorporate a heavyside function to model a switch-like behavior. For all models 100 cells were simulated, each initialized with a unique integer value between 1 and 100 to approximate heterogeneity in the cellular state. During initialization each cell was also assigned a threshold for activation (thresh) used in models M1 and M3 to determine whether a cell responds to a given dose. In all models, the strength of response to a dose of cytokine scales linearly with the cell's state, whereby a cell with state 100 and a cell with state 0 will have the strongest and weakest responses respectively. **(B)** Parameter values used for simulations described in (A) as well as Figure 1 of the main text. Basal noise ( $\eta_{\text{basal}}$ ) was used as a cut-off to quantify the non-responsive fraction in the right column of Figure 1B. That is, non-responders are defined as:  $Response \leq (\eta_{\text{basal}})_{\text{MAX}}$ .

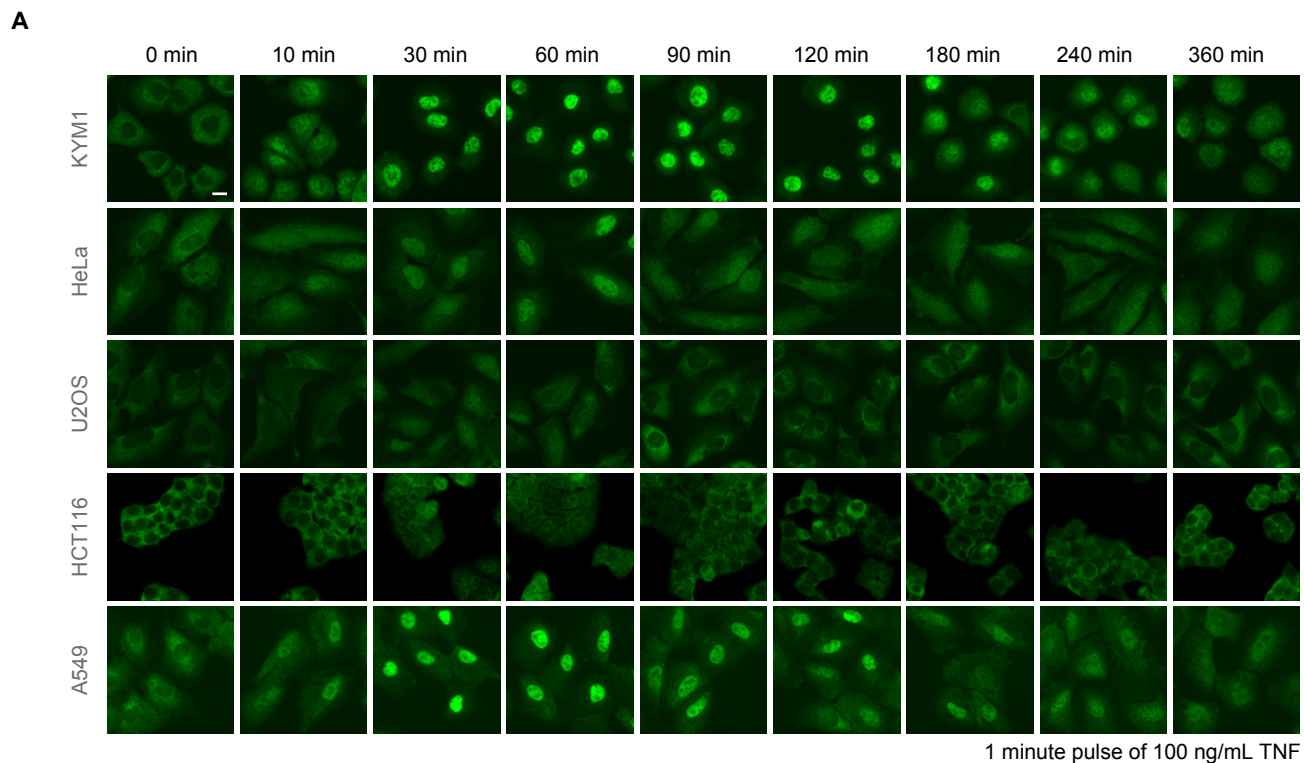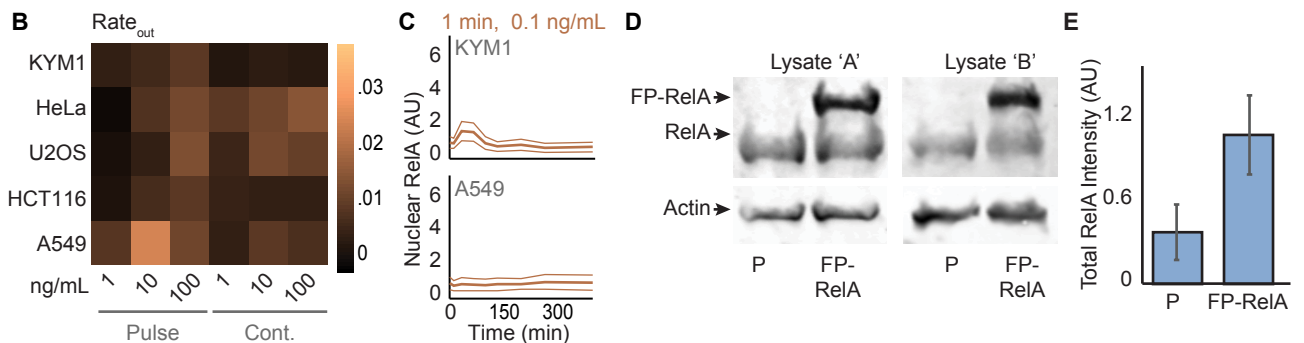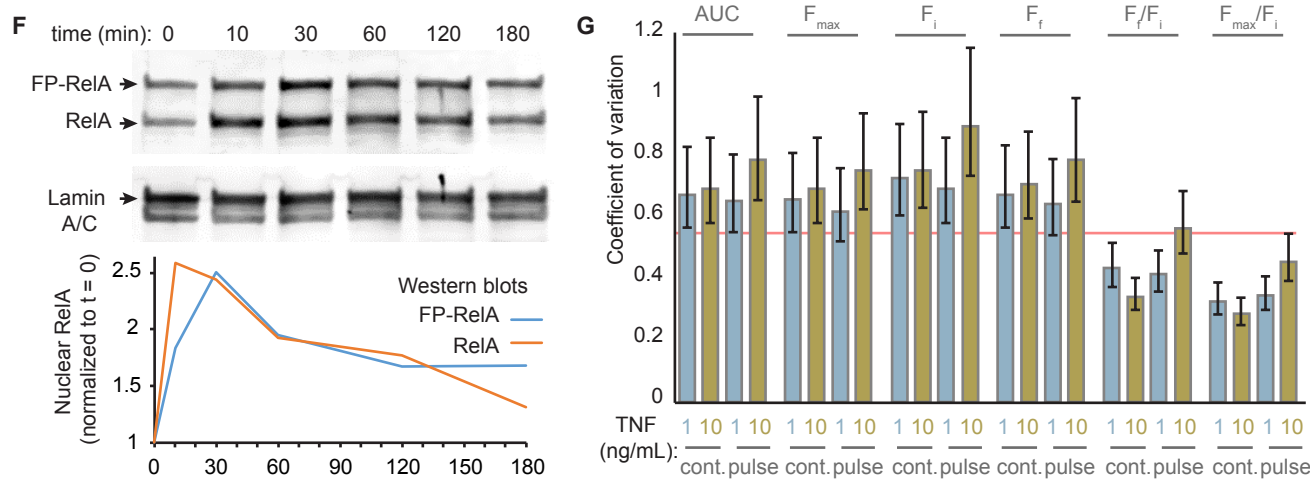

**Figure S2, related to main figure 2. Subcellular localization of endogenous RelA in human cancer cells. (A)** Fixed-cell RelA immunofluorescence images of KYM1, HeLa, U2OS, HCT116, and A549 cells. Cells were treated with a 1 minute pulse of 100 ng/mL of TNF and fixed at the indicated time after cytokine exposure; scale bar 10  $\mu$ m. **(B)** Heatmap for Rate<sub>out</sub> descriptor does not show a significant trend. **(C)** KYM1 cells show greater sensitivity to low concentrations of TNF when compared with A549 cells, the second most responsive cell line to TNF. **(D)** Western blot of RelA in lysates from parental KYM1 cells (P) and KYM1 cells that express mVenus-RelA (FP-RelA). Biological replicates are shown. **(E)** Quantification of bands from (D) show that FP-RelA is overexpressed 2.9-fold when compared with P KYM1 cells. For FP-RelA, endogenous and FP-RelA bands were summed;  $\pm$ SEM. **(F)** Western blot of nuclear lysates (top) from FP-RelA cells collected at indicated times after exposure to a 1 minute pulse of 10 ng/mL TNF. Quantification of endogenous and FP-RelA bands (bottom) show qualitatively similar dynamics to each other. **(G)** Bar graphs of the coefficients for variation for descriptors (described in Figure 2B) of nuclear FP-RelA density in cells exposed to TNF conditions as indicated. Error bars represent 95% confidence interval of the coefficient of variation.

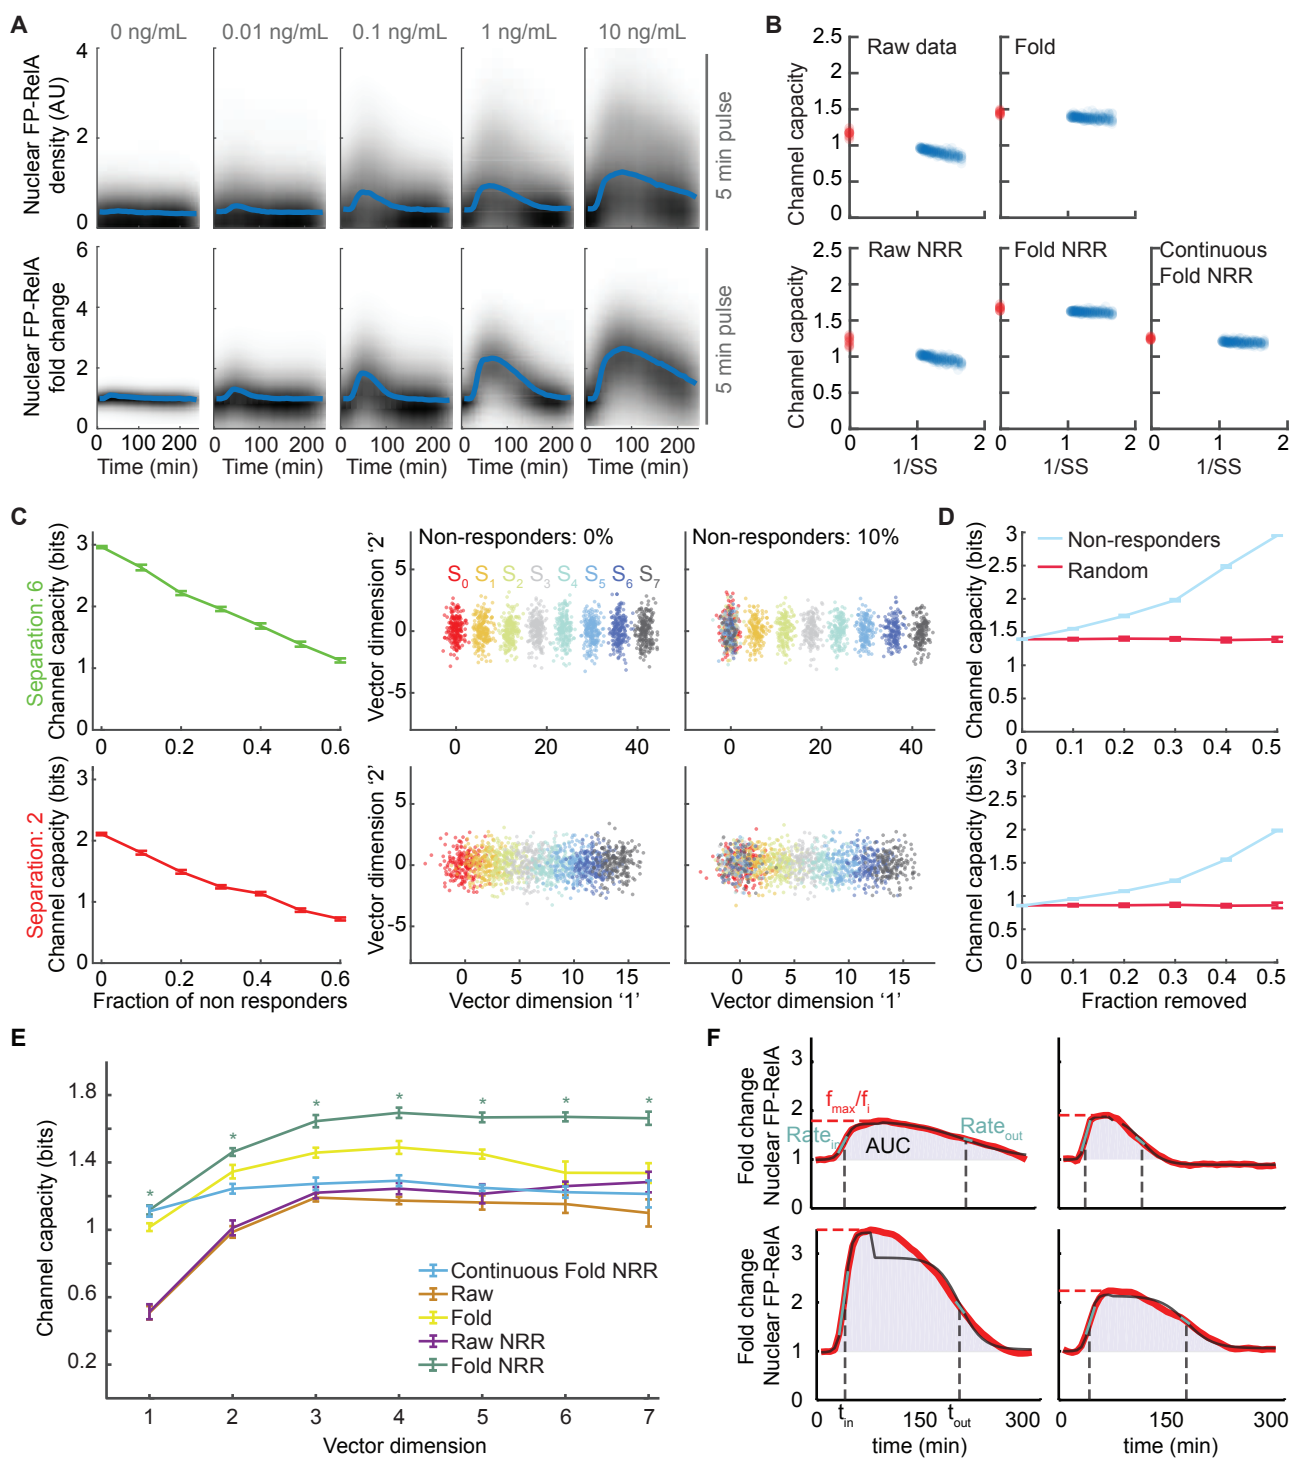

**Figure S3, related to main figure 3. Details of control analysis, models, and features used in channel capacity calculations. (A)** Density plots for nuclear FP-RelA in KYM1 cells exposed to a 5 minute TNF pulse of indicated concentration. Raw trajectories (top) and fold-transformed trajectories (bottom) are shown with the untreated control sample in the left-most column. **(B)** Plots showing jackknife analysis for channel capacity calculations. To correct for sample size bias and determine the variance of channel capacity values, the data set was jackknifed at sequentially increasing fractions, SS (points shown in blue) followed by linear regression to extrapolate the channel capacity at a sample size of infinity (i.e.  $1/SS = 0$ ; points shown in red). The lines obtained via linear regression are relatively flat, indicating that the size of our dataset is large enough to accurately estimate the channel capacity. **(C)** Plots showing the degradation in channel capacity of a system of eight 2-D Gaussians, when subpopulations of non-responders are considered. Fully separated Gaussians show the theoretical maximum channel capacity of 3 bits for this system (middle top). Overlap in the Gaussians (middle bottom), or the presence of bimodal distributions with an overlapping basal population (right) significantly reduces the values of channel capacity calculations (left);  $k = 10$ ;  $\pm$  standard deviation. **(D)** The effects of subsampling were simulated for the Gaussian system described in (C), except starting with 50% of the population sampled from the basal distribution for fully separated Gaussians (top) or overlapping Gaussians (bottom). In contrast with randomly targeted removal (red), channel capacity values after selectively removing a defined fraction of non-responders (blue) increases the channel capacity up to the defined limit revealing the true channel capacity of the responsive subpopulation;  $\pm$  standard deviation. **(E)** Channel capacity values calculated for each data set over a range of vector dimensions ( $d = 5$  is reported in the manuscript): Single-cell trajectories for 'Raw' data sets are in arbitrary fluorescence units; for 'Fold' data sets, each single-cell time course is represented as fold change (A); for 'NRR' data sets, single-cell trajectories with  $< 1.2$ -fold change in nuclear FP-RelA are removed; the continuous data set only includes conditions with continuous exposure to TNF (bottom row of Figure 3A). Green stars compare Fold-NRR and Raw-NRR ( $p < 10^{-6}$ , t test). **(F)** Representative sigmoid fits of five single cell time courses. The red lines show representative experimental trajectories for a single cell's nuclear FP-RelA time course. Black lines show two sigmoid fits used to approximate phases of nuclear entry and exit for FP-RelA and to calculate  $t_{in}$  and  $t_{out}$ .  $Rate_{in}$  and  $Rate_{out}$  were calculated from the slopes of adjacent time points from the experimental trajectory (teal line segments). The region used to calculate the AUC is indicated by the shaded area.

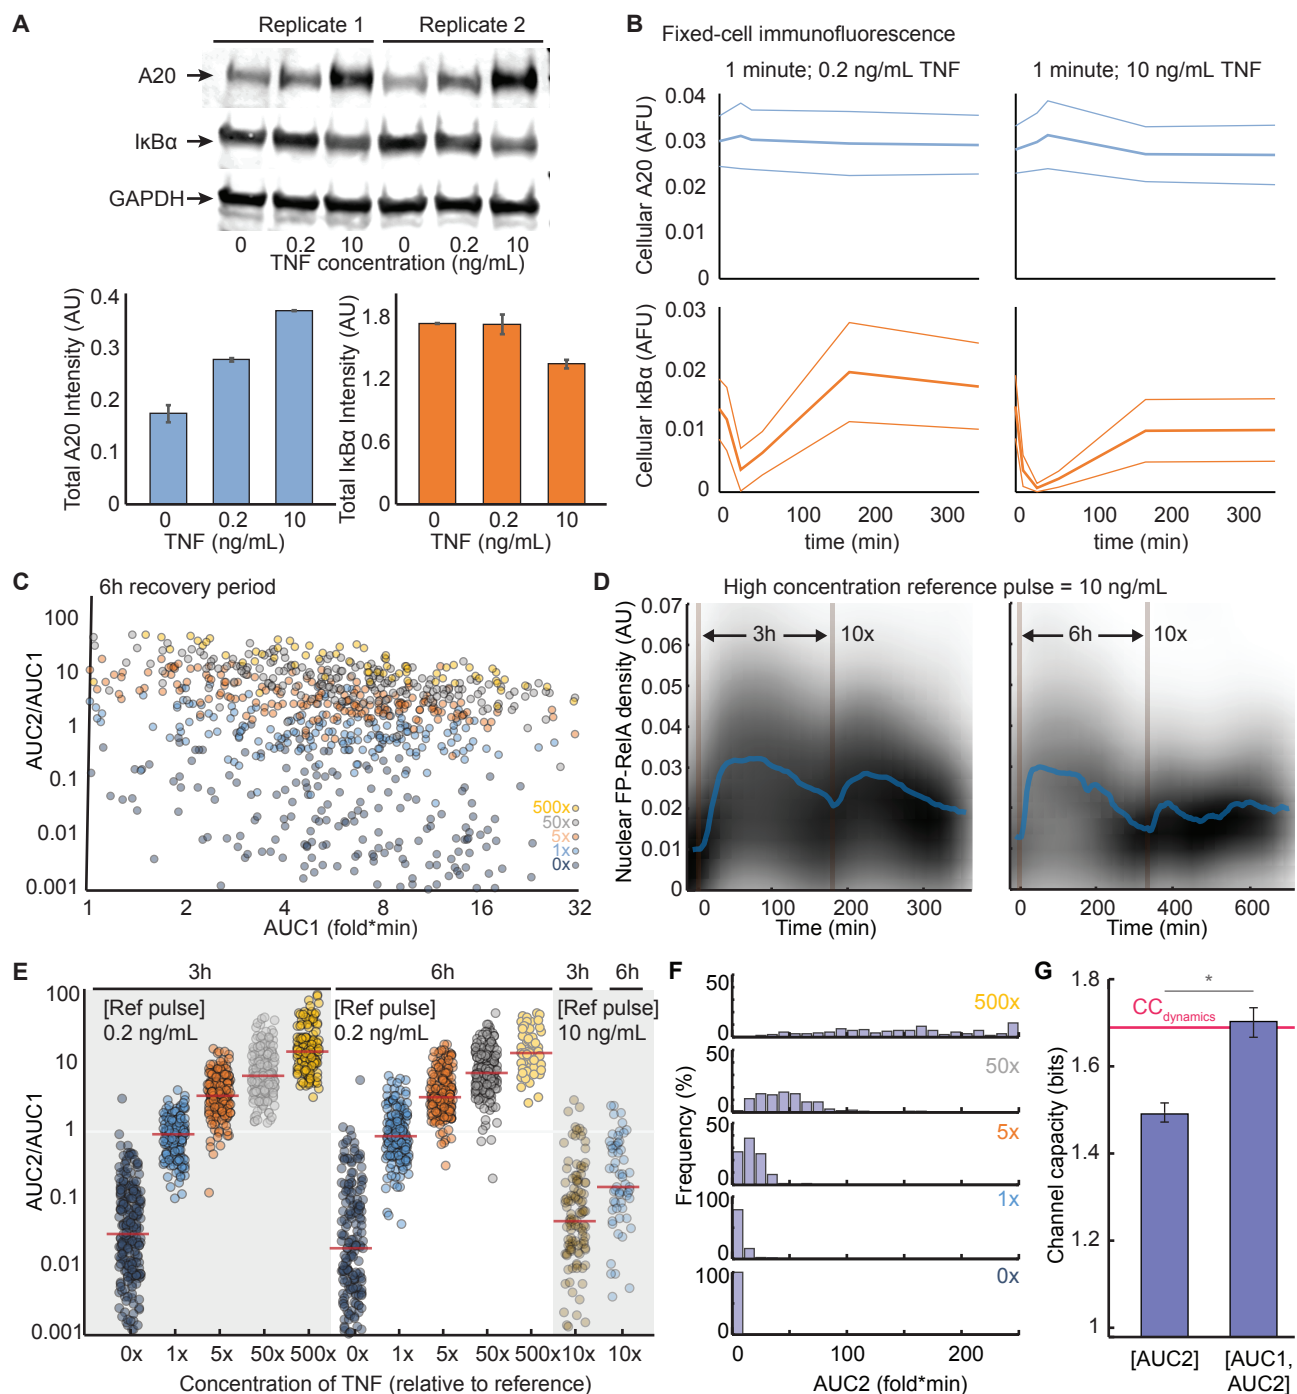



**Figure S4 related to main figure 4. Negative feedback and dampened responses in cells exposed to a high concentration reference pulse of TNF. (A)** Western blots (top) for regulators of negative feedback A20 and I $\kappa$ B $\alpha$  in KYM1 cells 3 hours after exposure to a 1 minute reference pulse of TNF at indicated concentration. GAPDH-normalized band intensities quantified in bar graphs (bottom) show that negative regulators are perturbed greater in response to a high concentration reference pulse (10 ng/mL) in comparison with a low concentration reference (0.2 ng/mL);  $\pm$ SEM of biological duplicate. **(B)** Results from (A) are confirmed by time courses for average cellular A20 (left) and I $\kappa$ B $\alpha$  from fixed-cell immunofluorescence KYM1 exposed to indicated TNF conditions. Light colored lines indicate the standard deviation. **(C)** Scatter plots showing AUC2/AUC1 stratified along AUC1 across the range of test conditions in cells after a 6 hour recovery period. **(D)** Density plots of single-cell FP-RelA time courses for cells exposed to a high concentration (10 ng/mL) reference pulse of TNF followed by a TNF pulse with a 10x increase in concentration 3 hours (left) or 6 hours (right) later. **(E)** Jitter plots comparing AUC2/AUC1 responses in single cells exposed to a low concentration reference pulse (0.2 ng/mL) or a high concentration reference pulse (10 ng/mL) of TNF with either a 3 hour or 6 hour intervening recovery window. Responses to test pulses are significantly dampened when cells are exposed to a high concentration reference pulse regardless of the duration of the recovery window. **(F)** Frequency distributions of AUC2 across the range of test conditions. **(G)** Channel capacity values calculated using AUC2 are compared with a vector that includes reference information about each cell ([AUC1, AUC2]). Red line indicates the channel capacity calculated from the full matrix of conditions (Figure 3);  $\pm$  standard deviation;  $p < 10^{-11}$ .

## **SUPPLEMENTAL MOVIE LEGENDS**

**Movie S1, related to main figure 2. TNF-induced nuclear translocation of FP-RelA in live KYM1 cells.** Time course of nuclear translocation in live KYM1 cells exposed continuously to 1 ng/mL TNF.

**Movie S2, related to main figure 4. Nuclear translocation of FP-RelA during repeat stimulation in live KYM1 cells.** Time course of nuclear translocation in live KYM1 cells exposed first to a 1 minute 'reference pulse' of 0.2 ng/mL TNF, followed 3 hours later by a 1 minute 'test pulse' of 1 ng/mL TNF (i.e. a 5x increase in concentration).

## SUPPLEMENTAL TABLES

**Table S1, related to main Figure 2. Summary of cell numbers for fixed cell experiments.**

For each condition cells were exposed continuously or to a pulse of cytokine, and fixed after 0, 10, 30, 60, 90, 120, 180, 240, or 360 minutes. 'Total' is the aggregate number of cells measured across all time points, 'Avg #' quantifies the average number of cells measured in each time point, and 'StDev' quantifies the standard deviation across time points for indicated condition.

|                   | 1 ng/ml      | 10 ng/ml | 100 ng/ml | 1 ng/ml    | 10 ng/ml   | 100 ng/ml  |
|-------------------|--------------|----------|-----------|------------|------------|------------|
|                   | Pulse        | Pulse    | Pulse     | Continuous | Continuous | Continuous |
|                   | <b>Total</b> |          |           |            |            |            |
| <b>KYM1 TNF</b>   | 8848         | 5390     | 8894      | 8981       | 8034       | 7376       |
| <b>HeLa TNF</b>   | 4356         | 4312     | 3818      | 5371       | 4865       | 5077       |
| <b>U2OS TNF</b>   | 8550         | 8280     | 8864      | 10706      | 10031      | 8856       |
| <b>HCT116 TNF</b> | 29243        | 23119    | 27174     | 33410      | 32012      | 29683      |
| <b>A549 TNF</b>   | 3512         | 2882     | 9066      | 6354       | 5689       | 8490       |
|                   | <b>Avg #</b> |          |           |            |            |            |
| <b>KYM1 TNF</b>   | 983.11       | 598.89   | 988.22    | 997.89     | 892.67     | 819.56     |
| <b>HeLa TNF</b>   | 484          | 479.11   | 424.22    | 596.78     | 540.56     | 564.11     |
| <b>U2OS TNF</b>   | 950          | 920      | 984.89    | 1189.56    | 1114.56    | 984        |
| <b>HCT116 TNF</b> | 3249.2<br>2  | 2568.78  | 3019.33   | 3712.22    | 3556.89    | 3298.11    |
| <b>A549 TNF</b>   | 390.22       | 320.22   | 1007.33   | 706        | 632.11     | 943.33     |
|                   | <b>StDev</b> |          |           |            |            |            |
| <b>KYM1 TNF</b>   | 120.48       | 103.66   | 167.87    | 230.21     | 321.18     | 370.25     |
| <b>HeLa TNF</b>   | 22.51        | 19.73    | 52.29     | 30.35      | 39.4       | 46.64      |
| <b>U2OS TNF</b>   | 295.58       | 152      | 241.88    | 333.66     | 343.66     | 172.45     |
| <b>HCT116 TNF</b> | 415.67       | 305.31   | 404.14    | 402.29     | 290.18     | 456.39     |
| <b>A549 TNF</b>   | 67.44        | 42.29    | 129.58    | 133.76     | 84.9       | 177.26     |

**Table S2. Related to main Figure 4. Summary of pairwise p-values for AUC2/AUC1 compared between test pulse conditions.** For each pair of test pulse conditions in Figure 4D, p-values are lower than listed. Concentrations listed are relative to a test pulse concentration of 0.2 ng/mL TNF.

| Test pulse | 0x         | 1x         | 5x         | 50x        | 500x       |
|------------|------------|------------|------------|------------|------------|
| 0x         | -          | $10^{-17}$ | $10^{-36}$ | $10^{-27}$ | $10^{-22}$ |
| 1x         | $10^{-17}$ | -          | $10^{-27}$ | $10^{-24}$ | $10^{-21}$ |
| 5x         | $10^{-36}$ | $10^{-27}$ | -          | $10^{-11}$ | $10^{-16}$ |
| 50x        | $10^{-27}$ | $10^{-24}$ | $10^{-11}$ | -          | $10^{-6}$  |
| 500x       | $10^{-22}$ | $10^{-21}$ | $10^{-16}$ | $10^{-6}$  | -          |
